# Supplementary material for: XPG rs873601 G>A contributes to uterine leiomyoma susceptibility in a Southern Chinese population
Source: PubMed Central journal article supplement (PMC6137253; doi:10.1042/bsr20181116), 2018-09-14
Supplement: bsr20181116_Supp1.pdf [file bsr20181116_Supp1.pdf]

Suppl. Table 1. Clinical and demographic characteristics of uterine fibroid patients and fibroid-free controls.

| Variables                  | Cases,n (%) | Controls, n (%) | <i>P</i> <sup>b</sup> |
|----------------------------|-------------|-----------------|-----------------------|
| All subjects               | 398(100.0)  | 733(100.0)      |                       |
| Age, yr                    |             |                 |                       |
| < 40                       | 274(68.8)   | 289(39.4)       | <0.001                |
| ≥ 40                       | 124(31.2)   | 444(60.6)       |                       |
| Menopause                  |             |                 |                       |
| No                         | 391 (98.2)  | 493 (67.3)      | <0.001                |
| Yes                        | 7 ( 1.8)    | 240 (32.7)      |                       |
| No. of myoma               |             |                 |                       |
| 1                          | 242(60.8)   | -               |                       |
| 2                          | 70(17.6)    | -               |                       |
| ≥3                         | 86(21.6)    | -               |                       |
| Site of myoma <sup>a</sup> |             |                 |                       |
| Intramural                 | 266(66.8)   | -               |                       |
| Subserous                  | 83(20.9)    | -               |                       |
| Intraligamentary           | 11( 2.8)    | -               |                       |
| Submucous                  | 34( 8.5)    | -               |                       |
| Cervical                   | 4 (1.0)     | -               |                       |
| Diameter, mm <sup>a</sup>  |             |                 |                       |
| ≤ 5.0                      | 161(40.5)   | -               |                       |
| > 5.0                      | 237(59.5)   | -               |                       |

Notes:<sup>a</sup> the characteristics of the biggest myoma; <sup>b</sup> chi-square test
